# Supplementary material for: The Petasites hybridus CO2 Extract (Ze 339) Blocks SARS-CoV-2 Replication In Vitro
Source: MDPI journal article supplement (doi:10.3390/v14010106), 2022-01-07
Supplement: s1 [file s1]

Supplemental material to:

The *Petasites hybridus* CO<sub>2</sub>-extract (Ze 339) blocks SARS-CoV-2 replication *in vitro*

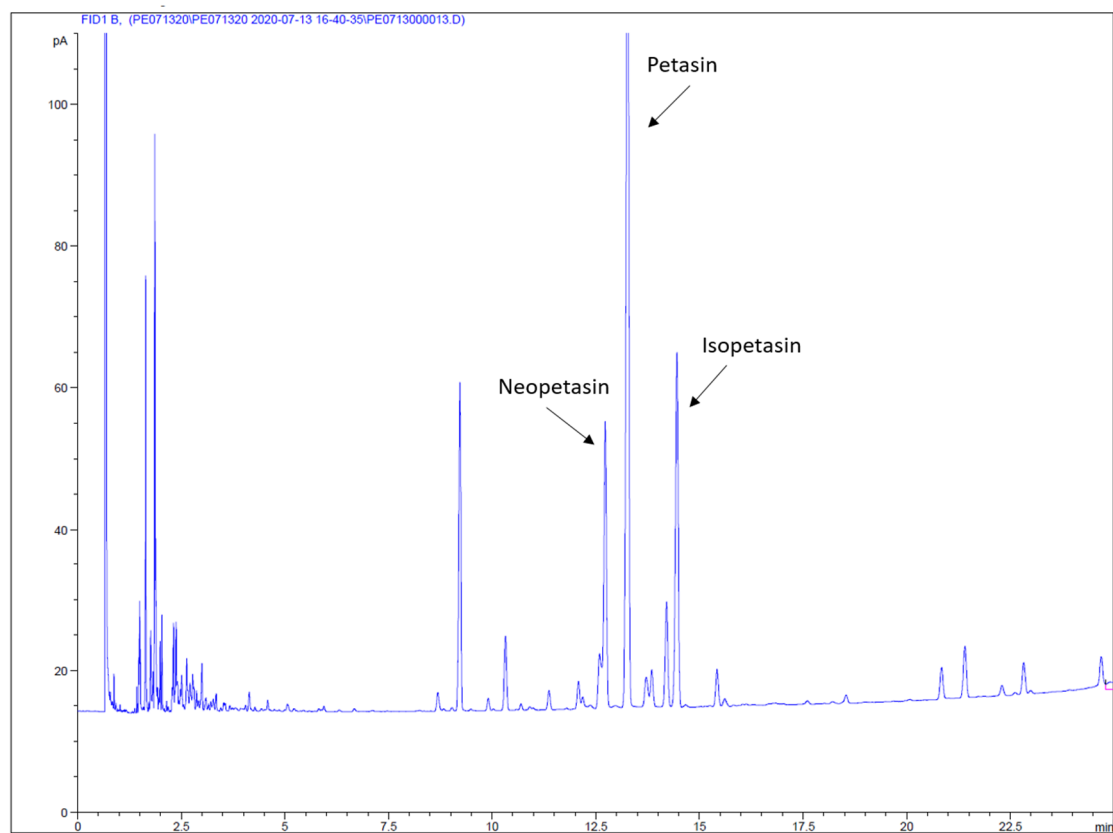

**Figure S1.** Gas chromatogram of *Petasites hybridus* leaf extract Ze 339 (batch 150056). Quantitative determination of total petasins (petasin, isopetasin, neopetasin), the active compounds of Ze 339 using gas chromatography and a flame ionization detector (FID). GC-column 100% polydimethylsiloxane (e.g. DB-1, length: 25 m, ID: 0.32 mm, dF: 0.52  $\mu$ m); Injector temperature: 270 °C; Injection volume 1  $\mu$ l.

(a)

drugdiscovery.utep.edu/redial/index2.php

Back

## RESULTS

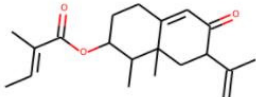

| LogP (Log units) | LogS (Log units) | Molecular Wt. (g/mol) | Formula                                        |
|------------------|------------------|-----------------------|------------------------------------------------|
| 5.17             | -4.37            | 316.44                | C <sub>20</sub> H <sub>28</sub> O <sub>3</sub> |

External reference:

| PubChem CID | Drug Central ID |
|-------------|-----------------|
| 3504628     | Not Found       |

Synonyms: -|-

Processed SMILES string:

C=C(C)C1CC2(C)C(=CC1=O)CCC(OC(=O)C(C)=CC)C2C

### Prediction Results

|                        | Class                                                            | Prediction | Confidence |
|------------------------|------------------------------------------------------------------|------------|------------|
| Live Virus Infectivity | SARS-CoV-2 cytopathic effect (CPE)                               | INACTIVE   | 0.93       |
|                        | SARS-CoV-2 cytopathic effect (host tox Counter) / Cytotoxicity   | INACTIVE   | 0.78       |
| Viral Entry            | Spike-ACE2 protein-protein interaction (AlphaLISA)               | ACTIVE     | 0.63       |
|                        | Spike-ACE2 protein-protein interaction (TruHit Counter)          | ACTIVE     | 0.73       |
|                        | ACE2 enzymatic activity                                          | INACTIVE   | 0.84       |
| Viral Replication      | 3CL enzymatic activity                                           | ACTIVE     | 0.53       |
| In vitro Infectivity   | SARS-CoV pseudotyped particle entry (CoV-PPE)                    | INACTIVE   | 0.56       |
|                        | SARS-CoV pseudotyped particle entry counter screen (CoV-PPE_cs)  | INACTIVE   | 0.62       |
|                        | MERS-CoV pseudotyped particle entry (MERS-PPE)                   | ACTIVE     | 0.69       |
|                        | MERS-CoV pseudotyped particle entry counter screen (MERS-PPE_cs) | INACTIVE   | 0.67       |
| Human Cell Toxicity    | Human fibroblast toxicity (hCYTOX)                               | INACTIVE   | 0.74       |
| Host Protein           | Sigma1 Receptor (sigma1R)                                        | INACTIVE   | 0.81       |

Promising drugs are those that:

- Are active in CPE and are inactive in cytotox

AND

- Are inactive in ACE2

AND

- Are active in 3CL

AND/OR

- Are active in at least one of the following: AlphaLISA, CoV-PPE, MERS-PPE. While they are inactive in the counter screen, respectively: TruHit, CoV-PPE\_cs, MERS-PPE\_cs

AND

- Are inactive in hCYTOX

(b)

REDIAL-2020 - Google Chrome  
drugdiscovery.utep.edu/redial/index2.php

## RESULTS

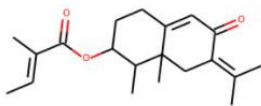

| LogP (Log units) | LogS (Log units) | Molecular Wt. (g/mol) | Formula                                        |
|------------------|------------------|-----------------------|------------------------------------------------|
| 5.03             | -4.24            | 316.44                | C <sub>20</sub> H <sub>28</sub> O <sub>3</sub> |

External reference:

| PubChem CID | Drug Central ID |
|-------------|-----------------|
| 78385141    | Not Found       |

Synonyms: -|-

Processed SMILES string:  
CC=C(C)C(=O)OC1CCC2=CC(=O)C(=C(C)C)CC2(C)C1C

### Prediction Results

|                        | Class                                                            | Prediction | Confidence |
|------------------------|------------------------------------------------------------------|------------|------------|
| Live Virus Infectivity | SARS-CoV-2 cytopathic effect (CPE)                               | INACTIVE   | 0.93       |
|                        | SARS-CoV-2 cytopathic effect (host tox Counter) / Cytotoxicity   | INACTIVE   | 0.76       |
| Viral Entry            | Spike-ACE2 protein-protein interaction (AlphaLISA)               | ACTIVE     | 0.68       |
|                        | Spike-ACE2 protein-protein interaction (TruHit Counter)          | ACTIVE     | 0.64       |
|                        | ACE2 enzymatic activity                                          | INACTIVE   | 0.87       |
| Viral Replication      | 3CL enzymatic activity                                           | INACTIVE   | 0.49       |
| In vitro Infectivity   | SARS-CoV pseudotyped particle entry (CoV-PPE)                    | INACTIVE   | 0.57       |
|                        | SARS-CoV pseudotyped particle entry counter screen (CoV-PPE_cs)  | INACTIVE   | 0.66       |
|                        | MERS-CoV pseudotyped particle entry (MERS-PPE)                   | INACTIVE   | 0.41       |
|                        | MERS-CoV pseudotyped particle entry counter screen (MERS-PPE_cs) | INACTIVE   | 0.67       |
| Human Cell Toxicity    | Human fibroblast toxicity (hCYTOX)                               | INACTIVE   | 0.79       |
| Host Protein           | Sigma1 Receptor (sigma1R)                                        | INACTIVE   | 0.81       |

Promising drugs are those that:

- Are active in CPE and are inactive in cytotox

AND

- Are inactive in ACE2

AND

- Are active in 3CL

AND/OR

- Are active in at least one of the following: AlphaLISA, CoV-PPE, MERS-PPE. While they are inactive in the counter screen, respectively: TruHit, CoV-PPE\_cs, MERS-PPE\_cs

AND

- Are inactive in hCYTOX

Figure S2. Prediction of anti-viral mechanisms (a) Petasin (b) Isopetasin

(<http://drugcentral.org/Redial>)

**Table S1.** Druglikeness of petasin, isopetasin and neopetasin (SwissADME: a free web tool to evaluate pharmacokinetics, drug-likeness and medicinal chemistry friendliness of small molecules [1]).

|              | Criterion                      | Petasin | Neopetasin | Isopetasin | Acceptance |
|--------------|--------------------------------|---------|------------|------------|------------|
| Lipinski [2] | MW $\leq$ 500                  | 316.4   | 316.4      | 316.4      | yes        |
|              | MLogP $\leq$ 4.15              | 3.48    | 3.48       | 3.48       | yes        |
|              | H-Bond Donors $\leq$ 5         | 0       | 0          | 0          | yes        |
|              | H-Bond Acceptors $\leq$ 10     | 3       | 3          | 3          | yes        |
| Ghose [3]    | 150 $\leq$ MW $\leq$ 480       | 316.4   | 316.4      | 316.4      | yes        |
|              | -0.4 $\leq$ WLogP $\leq$ 5.6   | 4.39    | 4.39       | 4.45       | yes        |
|              | 40 $\leq$ MR $\leq$ 130        | 93.8    | 93.8       | 93.8       | yes        |
|              | 20 $\leq$ atoms $\leq$ 70      | 51      | 51         | 51         | yes        |
| Veber [4]    | Rotatable bonds $\leq$ 10      | 4       | 4          | 3          | yes        |
|              | TPSA $\leq$ 140 Å <sup>2</sup> | 43.37   | 43.37      | 43.37      | yes        |

MW = molecular weight, MR = molecular refractivity, MLogP = rule-based Moriguchi Log P [2], WLogP = a purely atomistic method based Log P estimate on the fragmental system ([5], TPSA = Topological polar surface area.

## References

1. Kc, G.B.; Bocci, G.; Verma, S.; Hassan, M.M.; Holmes, J.; Yang, J.J.; Sirimulla, S.; Oprea, T.I. A machine learning platform to estimate anti-SARS-CoV-2 activities. *Nature Machine Intelligence* **2021**, *3*, 527-535, doi:10.1038/s42256-021-00335-w.
2. Daina, A.; Michielin, O.; Zoete, V. SwissADME: a free web tool to evaluate pharmacokinetics, drug-likeness and medicinal chemistry friendliness of small molecules. *Sci Rep* **2017**, *7*, 42717, doi:10.1038/srep42717.
3. Lipinski, C.A.; Lombardo, F.; Dominy, B.W.; Feeney, P.J. Experimental and computational approaches to estimate solubility and permeability in drug discovery and development settings. *Adv Drug Deliv Rev* **2001**, *46*, 3-26, doi:10.1016/s0169-409x(00)00129-0.
4. Ghose, A.K.; Viswanadhan, V.N.; Wendoloski, J.J. A knowledge-based approach in designing combinatorial or medicinal chemistry libraries for drug discovery. 1. A qualitative and quantitative characterization of known drug databases. *J Comb Chem* **1999**, *1*, 55-68, doi:10.1021/cc9800071.
5. Veber, D.F.; Johnson, S.R.; Cheng, H.Y.; Smith, B.R.; Ward, K.W.; Kopple, K.D. Molecular properties that influence the oral bioavailability of drug candidates. *J Med Chem* **2002**, *45*, 2615-2623, doi:10.1021/jm020017n.
6. Wildman, S.A.; Crippen, G.M. Prediction of Physicochemical Parameters by Atomic Contributions. *J Chem Inf Comput Sci* **1999**, *39*, 868-873, doi:10.1021/ci9903071.
